# Supplementary material for: Androgen Deprivation Therapy for Prostate Cancer and Neurocognitive Disorders: A Systematic Review and Meta-Analysis
Source: Research Square preprint supplement (doi:10.21203/rs.3.rs-3221041/v1), 2023-08-14

PRISMA 2020 flow diagram for new systematic reviews which included searches of databases and registers only

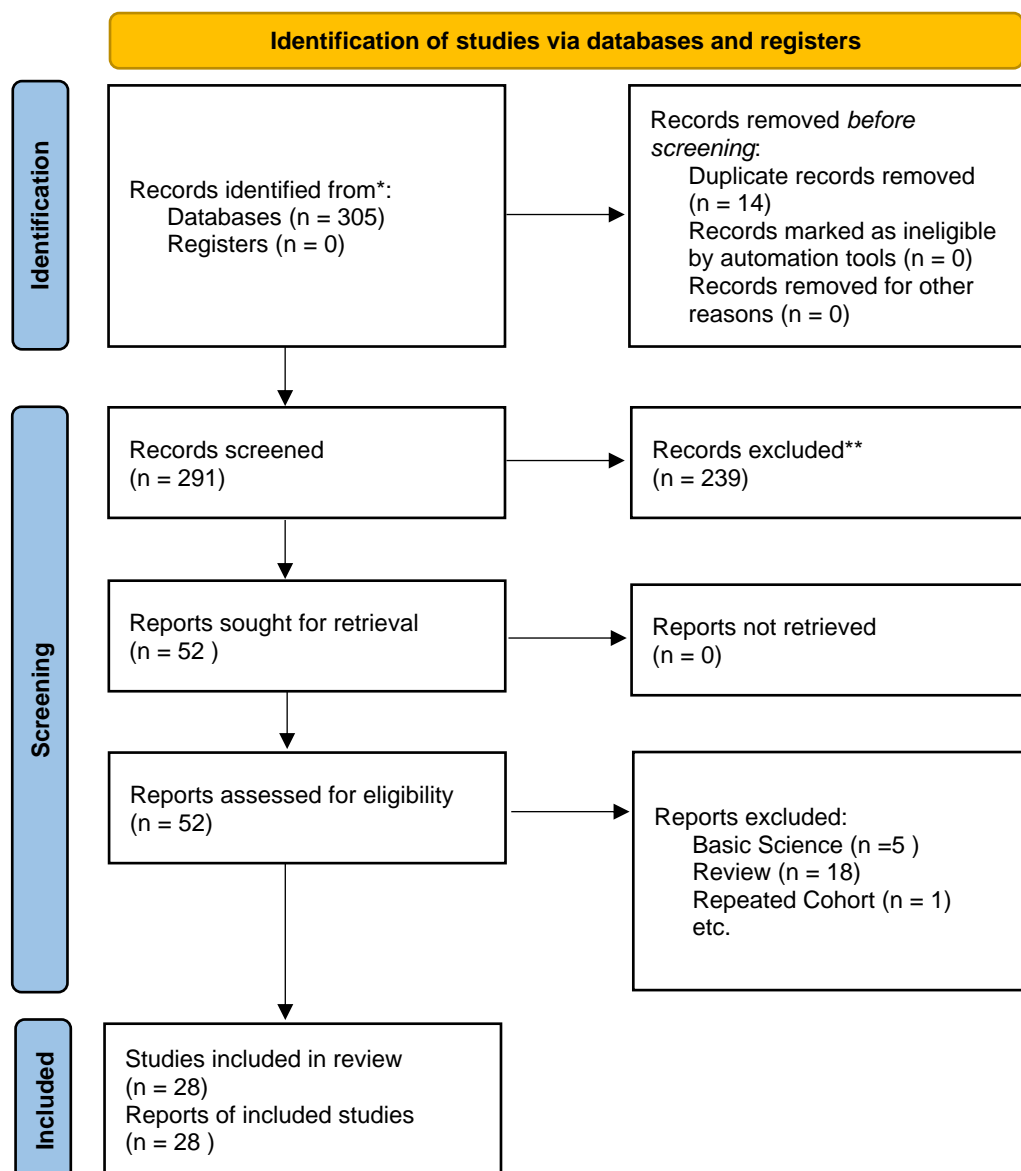

Supplement: Supplementary file 1 [file c4a5239ee4c4badcc4c49de2.pdf]
